# Supplementary material
Source: PubMed Central journal article supplement (PMC8563515)
Supplement: 125_2021_5558_MOESM1_ESM.pdf [file 125_2021_5558_MOESM1_ESM.pdf]

## SUPPLEMENTAL FIGURES AND TABLES

**ESM Table 1. Additional participant characteristics**

| Parameter                              | Mean $\pm$ SD    |
|----------------------------------------|------------------|
| Body weight (kg)                       | 80.1 $\pm$ 9.2   |
| Waist circumference (cm)               | 97 $\pm$ 9       |
| Hip circumference (cm)                 | 110 $\pm$ 8      |
| Fat mass (%)                           | 46.1 $\pm$ 11.3  |
| Systolic blood pressure                | 133 $\pm$ 16     |
| Diastolic blood pressure               | 85 $\pm$ 9       |
| Physical activity level (Baecke score) | 6.55 $\pm$ 0.95  |
| Habitual sitting + sleeping time (h)   | 17.6 $\pm$ 1.2   |
| Habitual standing time (h)             | 4.3 $\pm$ 1.2    |
| Habitual walking time (h)              | 2.1 $\pm$ 0.6    |
| Habitual steps/day (n)                 | 10141 $\pm$ 3250 |
| Habitual cadence (steps/min)           | 80 $\pm$ 5       |

**ESM Table 2. Medication of participants**

| Medication                     | N |
|--------------------------------|---|
| Lipid lowering drugs (statins) | 2 |
| Blood pressure lowering drugs  | 1 |
| Glaucoma medication            | 1 |

**ESM Table 3. Physical activity during activity regimes**

| Parameter                             | SIT        | SL          | EXE        | p-value | p-value SIT vs EXE | p-value SIT vs SL | p-value EXE vs SL |
|---------------------------------------|------------|-------------|------------|---------|--------------------|-------------------|-------------------|
| Sitting (h/day)                       | 13.6 ± 0.2 | 9.2 ± 0.2   | 12.5 ± 0.3 | <0.01*  | <0.01*             | <0.01*            | <0.01*            |
| Standing (h/day)                      | 1.3 ± 0.1  | 4.0 ± 0.1   | 1.2 ± 0.1  | <0.01*  | 0.99               | <0.01*            | <0.01*            |
| Walking (h/day)                       | 1.0 ± 0.0  | 3.0 ± 0.1   | 1.0 ± 0.0  | <0.01*  | 0.46               | <0.01*            | <0.01*            |
| Exercise (h/day)                      | -          | -           | 1.0 ± 0.1  | -       | -                  | -                 | -                 |
| Sleeping (h/day)                      | 8.1 ± 0.1  | 7.9 ± 0.2   | 8.1 ± 0.1  | 0.28    | 0.99               | 0.83              | 0.29              |
| Steps/day (n) <sup>1</sup>            | 4878 ± 240 | 16875 ± 463 | 5082 ± 165 | <0.01*  | 0.62               | <0.01*            | <0.01*            |
| Cadence (steps/min) <sup>1</sup>      | 85 ± 3     | 94 ± 2      | 86 ± 2     | <0.01*  | 0.99               | <0.01*            | <0.01*            |
| Estimated EE <sup>1</sup> (MET*h/day) | 32.0 ± 0.1 | 37.0 ± 0.2  | 36.6 ± 0.2 | <0.01*  | <0.01*             | <0.01*            | 0.38              |

Abbreviations: SIT, sit regime; EXE, exercise regime; SL, sitting less regime. Data are expressed as mean ± SE. N=12, <sup>1</sup>n=11. \*p<0.05.

**ESM Table 4. Insulin sensitivity and substrate kinetics**

| Parameter                                                         | SIT             | SL              | EXE             | p-value | p-value SIT vs EXE | p-value SIT vs SL | p-value EXE vs SL |
|-------------------------------------------------------------------|-----------------|-----------------|-----------------|---------|--------------------|-------------------|-------------------|
| <b>Ra (<math>\mu\text{mol/kg/min}</math>)</b>                     |                 |                 |                 |         |                    |                   |                   |
| Baseline                                                          | 7.6 $\pm$ 0.4   | 8.4 $\pm$ 0.5   | 7.3 $\pm$ 0.5   | 0.21    | 0.99               | 0.46              | 0.31              |
| Low insulin <sup>1</sup>                                          | 11.9 $\pm$ 1.3  | 11.9 $\pm$ 0.7  | 11.7 $\pm$ 1.0  | 0.73    | 0.99               | 0.99              | 0.99              |
| High insulin <sup>2</sup>                                         | 29.8 $\pm$ 3.6  | 32.8 $\pm$ 3.2  | 36.1 $\pm$ 3.8  | <0.01** | 0.01*              | 0.22              | 0.79              |
| <b>Rd (<math>\mu\text{mol/kg/min}</math>)</b>                     |                 |                 |                 |         |                    |                   |                   |
| Baseline                                                          | 7.3 $\pm$ 0.4   | 7.6 $\pm$ 0.6   | 6.9 $\pm$ 0.5   | 0.56    | 0.99               | 0.99              | 0.92              |
| Low insulin <sup>1</sup>                                          | 12.5 $\pm$ 1.2  | 12.3 $\pm$ 0.9  | 11.8 $\pm$ 0.9  | 0.73    | 0.99               | 0.99              | 0.99              |
| High insulin <sup>2</sup>                                         | 29.4 $\pm$ 3.7  | 33.1 $\pm$ 3.2  | 35.2 $\pm$ 3.8  | <0.01** | <0.01**            | 0.03*             | 0.99              |
| Delta baseline-low <sup>1</sup>                                   | 5.0 $\pm$ 1.2   | 4.7 $\pm$ 0.7   | 4.9 $\pm$ 0.8   | 0.98    | 0.99               | 0.99              | 0.99              |
| Delta baseline-high <sup>2</sup>                                  | 20.7 $\pm$ 3.7  | 25.5 $\pm$ 2.8  | 28.2 $\pm$ 3.3  | <0.01** | <0.01**            | 0.08#             | 0.99              |
| <b>EGP (<math>\mu\text{mol/kg/min}</math>)</b>                    |                 |                 |                 |         |                    |                   |                   |
| Baseline                                                          | 7.6 $\pm$ 0.4   | 8.4 $\pm$ 0.5   | 7.3 $\pm$ 0.5   | 0.21    | 0.99               | 0.46              | 0.31              |
| Low insulin <sup>1</sup>                                          | 2.0 $\pm$ 0.2   | 2.3 $\pm$ 0.2   | 2.3 $\pm$ 0.2   | 0.16    | 0.60               | 0.17              | 0.99              |
| % suppression low <sup>1</sup>                                    | 73.6 $\pm$ 3.7  | 72.1 $\pm$ 2.9  | 69.2 $\pm$ 3.7  | 0.98    | 0.99               | 0.99              | 0.99              |
| High insulin <sup>2</sup>                                         | 0.4 $\pm$ 0.2   | 0.3 $\pm$ 0.1   | 0.7 $\pm$ 0.2   | 0.71    | 0.99               | 0.99              | 0.99              |
| % suppression high <sup>2</sup>                                   | 93.6 $\pm$ 2.7  | 96.4 $\pm$ 1.9  | 90.0 $\pm$ 2.9  | 0.44    | 0.99               | 0.99              | 0.54              |
| <b>NOGD (<math>\mu\text{mol/kg/min}</math>)</b>                   |                 |                 |                 |         |                    |                   |                   |
| Baseline <sup>1</sup>                                             | 2.6 $\pm$ 0.6   | 4.0 $\pm$ 0.7   | 3.0 $\pm$ 0.6   | 0.63    | 0.99               | 0.99              | 0.86              |
| Low insulin <sup>1</sup>                                          | 3.9 $\pm$ 1.2   | 4.9 $\pm$ 1.0   | 4.3 $\pm$ 0.9   | 0.63    | 0.86               | 0.99              | 0.99              |
| High insulin <sup>2</sup>                                         | 15.7 $\pm$ 2.8  | 19.9 $\pm$ 2.6  | 22.3 $\pm$ 3.0  | <0.01** | <0.01**            | 0.04*             | 0.79              |
| Delta baseline-low <sup>2</sup>                                   | 1.0 $\pm$ 1.7   | 1.0 $\pm$ 0.7   | 1.0 $\pm$ 0.8   | 0.60    | 0.99               | 0.79              | 0.99              |
| Delta baseline-high <sup>3</sup>                                  | 12.2 $\pm$ 2.9  | 15.0 $\pm$ 2.6  | 18.5 $\pm$ 2.6  | 0.01*   | 0.01*              | 0.10#             | 0.99              |
| <b>Carbohydrate oxidation (<math>\mu\text{mol/kg/min}</math>)</b> |                 |                 |                 |         |                    |                   |                   |
| Baseline <sup>1</sup>                                             | 5.0 $\pm$ 0.6   | 4.2 $\pm$ 0.7   | 4.5 $\pm$ 1.0   | 0.24    | 0.46               | 0.13              | 0.91              |
| Low insulin <sup>1</sup>                                          | 8.6 $\pm$ 0.6   | 7.5 $\pm$ 0.6   | 7.5 $\pm$ 0.8   | 0.35    | 0.41               | 0.86              | 0.99              |
| High insulin <sup>2</sup>                                         | 13.8 $\pm$ 1.0  | 13.7 $\pm$ 1.2  | 13.4 $\pm$ 1.1  | 0.98    | 0.99               | 0.99              | 0.99              |
| <b>Fat oxidation (<math>\mu\text{mol/kg/min}</math>)</b>          |                 |                 |                 |         |                    |                   |                   |
| Baseline <sup>1</sup>                                             | 3.3 $\pm$ 0.2   | 3.6 $\pm$ 0.1   | 3.7 $\pm$ 0.2   | 0.19    | 0.33               | 0.18              | 0.81              |
| Low insulin <sup>1</sup>                                          | 2.3 $\pm$ 0.2   | 2.6 $\pm$ 0.2   | 2.5 $\pm$ 0.2   | 0.26    | 0.26               | 0.99              | 0.99              |
| High insulin <sup>2</sup>                                         | 1.1 $\pm$ 0.2   | 1.3 $\pm$ 0.2   | 1.3 $\pm$ 0.2   | 0.51    | 0.99               | 0.72              | 0.99              |
| <b>Respiratory exchange ratio</b>                                 |                 |                 |                 |         |                    |                   |                   |
| Baseline <sup>1</sup>                                             | 0.78 $\pm$ 0.01 | 0.76 $\pm$ 0.01 | 0.76 $\pm$ 0.01 | 0.16    | 0.59               | 0.10#             | 0.99              |
| Low insulin <sup>1</sup>                                          | 0.84 $\pm$ 0.01 | 0.82 $\pm$ 0.01 | 0.82 $\pm$ 0.01 | 0.20    | 0.63               | 0.22              | 0.99              |
| High insulin <sup>2</sup>                                         | 0.92 $\pm$ 0.01 | 0.91 $\pm$ 0.01 | 0.91 $\pm$ 0.01 | 0.63    | 0.99               | 0.99              | 0.99              |
| Delta baseline-low <sup>1</sup>                                   | 0.07 $\pm$ 0.01 | 0.06 $\pm$ 0.01 | 0.07 $\pm$ 0.01 | 0.66    | 0.99               | 0.99              | 0.99              |
| Delta baseline-high <sup>2</sup>                                  | 0.13 $\pm$ 0.01 | 0.14 $\pm$ 0.02 | 0.14 $\pm$ 0.02 | 0.69    | 0.99               | 0.99              | 0.99              |

Abbreviations: SIT, sit regime; EXE, exercise regime; SL, sitting less regime; Ra, rate of appearance; Rd, rate of disappearance; EGP, endogenous glucose production; NOGD, non-oxidative glucose disposal Data are expressed as mean  $\pm$  SE. <sup>1</sup>n=11, <sup>2</sup>n=10, <sup>3</sup>n=9. \*\* p<0.01, \*p<0.05, #p<0.10.

**ESM Table 5. Ex vivo skeletal muscle mitochondrial respiratory capacity**

| O <sub>2</sub> flux<br>(pmol/mg/s) | SIT            | SL             | EXE            | p-<br>value | p-<br>value<br>SIT<br>vs<br>EXE | p-<br>value<br>SIT<br>vs SL | p-<br>value<br>EXE<br>vs SL |
|------------------------------------|----------------|----------------|----------------|-------------|---------------------------------|-----------------------------|-----------------------------|
| MG3                                | 37.5 $\pm$ 2.3 | 35.8 $\pm$ 2.2 | 38.5 $\pm$ 2.7 | 0.42        | 0.99                            | 0.69                        | 0.78                        |
| MO3                                | 36.1 $\pm$ 2.5 | 36.2 $\pm$ 2.9 | 37.7 $\pm$ 2.2 | 0.66        | 0.99                            | 0.99                        | 0.99                        |
| MOG3                               | 47.1 $\pm$ 3.9 | 44.7 $\pm$ 3.3 | 47.5 $\pm$ 2.6 | 0.54        | 0.99                            | 0.99                        | 0.84                        |
| MGS3                               | 72.1 $\pm$ 4.5 | 67.1 $\pm$ 4.5 | 73.4 $\pm$ 3.9 | 0.25        | 0.99                            | 0.77                        | 0.52                        |
| MOGS3                              | 72.0 $\pm$ 6.1 | 68.0 $\pm$ 5.0 | 71.9 $\pm$ 3.2 | 0.58        | 0.99                            | 0.99                        | 0.99                        |
| FCCP                               | 88.5 $\pm$ 8.7 | 87.8 $\pm$ 7.2 | 93.7 $\pm$ 5.8 | 0.53        | 0.87                            | 0.99                        | 0.99                        |
| Oligomycin                         | 24.5 $\pm$ 1.8 | 23.0 $\pm$ 2.1 | 23.8 $\pm$ 1.5 | 0.53        | 0.99                            | 0.88                        | 0.99                        |

Abbreviations: SIT, sit regime; EXE, exercise regime; SL, sitting less regime; MG3, malate + glutamate; MO3, malate + octanoyl carnitine + glutamate; MOG3, malate + octanoyl carnitine + glutamate; MGS3, malate + glutamate + succinate; MOGS3, malate + octanoyl carnitine + glutamate + succinate; FCCP, maximal FCCP-induced uncoupled respiration; Oligomycin, oligomycin induced respiration not coupled to ATP synthesis. Data are expressed as mean  $\pm$  SE in pmol per mg wet weight per second. N=11.

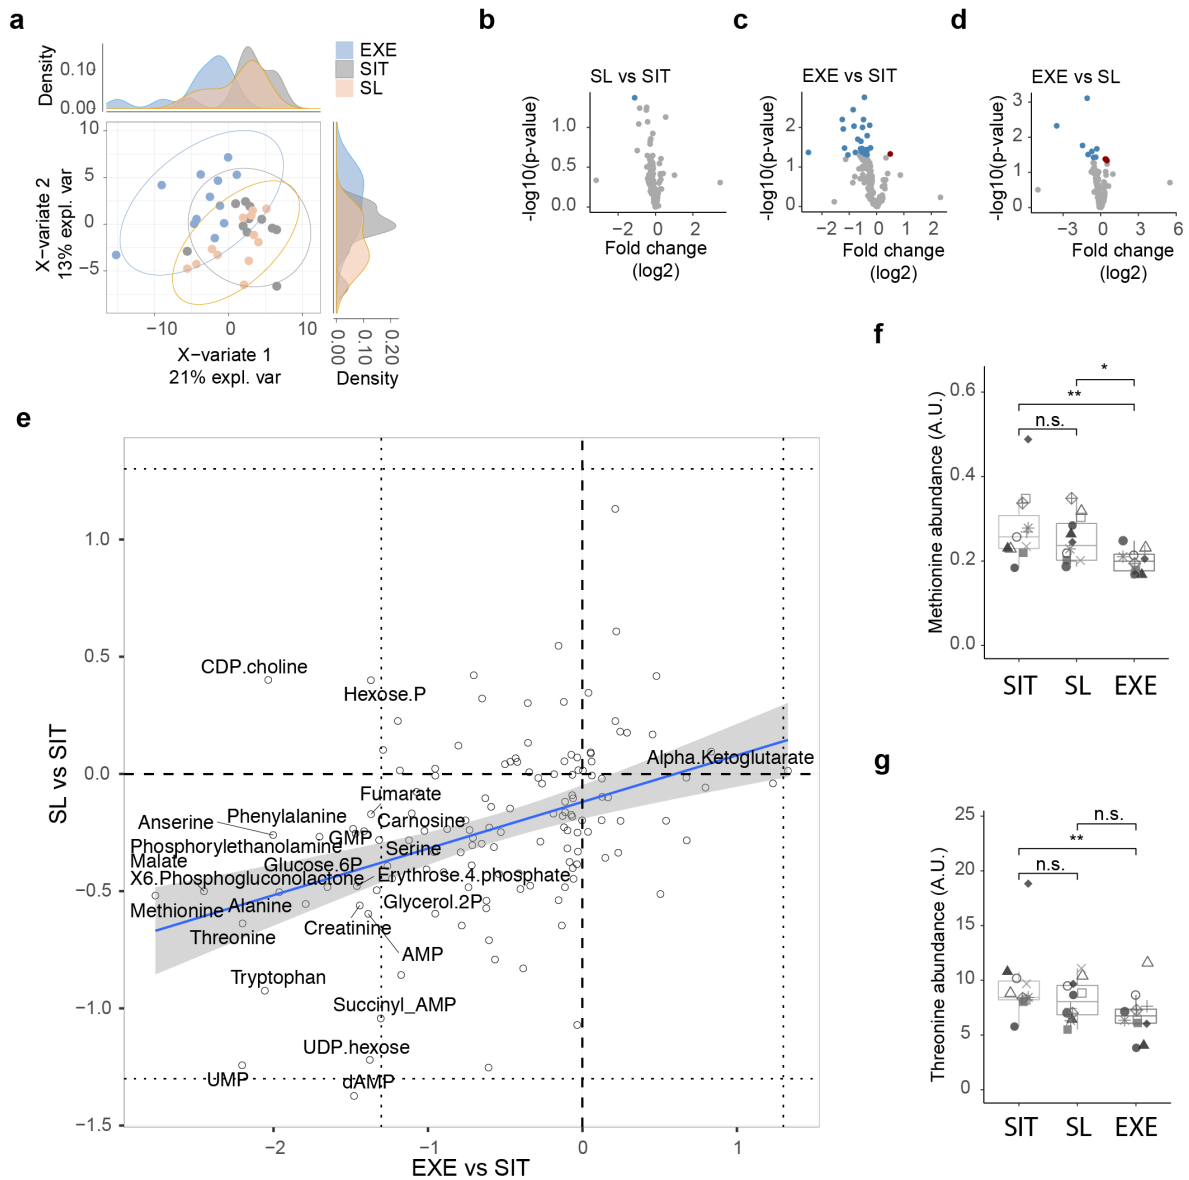

**ESM Figure 1: Metabolomic effects of sitting, sitting less, and exercise in skeletal muscle:** Regimes for sitting, sitting less, and exercise are denoted as SIT, SL, and EXE, respectively. **a)** Partial least squares discriminant analysis (PLS-DA) on the metabolomes of individuals in the sitting, sitting less, and exercise regimes,  $n=11$ , plotting the first component (X-variate 1) and second component (X-variate 2) of the PLS-DA. **b-d)** Volcano plots of fold change (x axis, log2 scale) versus p value (y axis,  $-\log_{10}$  scale), for **b)** sitting less vs sit, **c)** exercise vs sit, and **d)** exercise vs sitting less. Reveals exercise to induce the greatest number of metabolic changes. **e)** Highlighted metabolites for plot comparing the significance of differences that exercise induces (compared to sitting), relative to what sitting less induces (compared to sitting). Units on the axes are p values in the  $-\log_{10}$  scale. Directionality of induced changes are represented as either negative values (decreased) or positive values (increased). Pearson's  $r = 0.393$ ,  $p$  value =  $2e-06$  (pertains to main figure 3b). Further visualization of metabolites including **f)** methionine and **g)** threonine illustrates stepwise abundance levels in the sit, sitting less, and exercise regimes. For all panels: \* $p < 0.05$ , \*\* $p < 0.01$
